# Supplementary material
Source: PubMed Central journal article supplement (PMC3832274)
Supplement: 58957d88180bfd8b432596ae6294304a_genetics.113.155945-8.pdf [file 58957d88180bfd8b432596ae6294304a_genetics.113.155945-8.pdf]

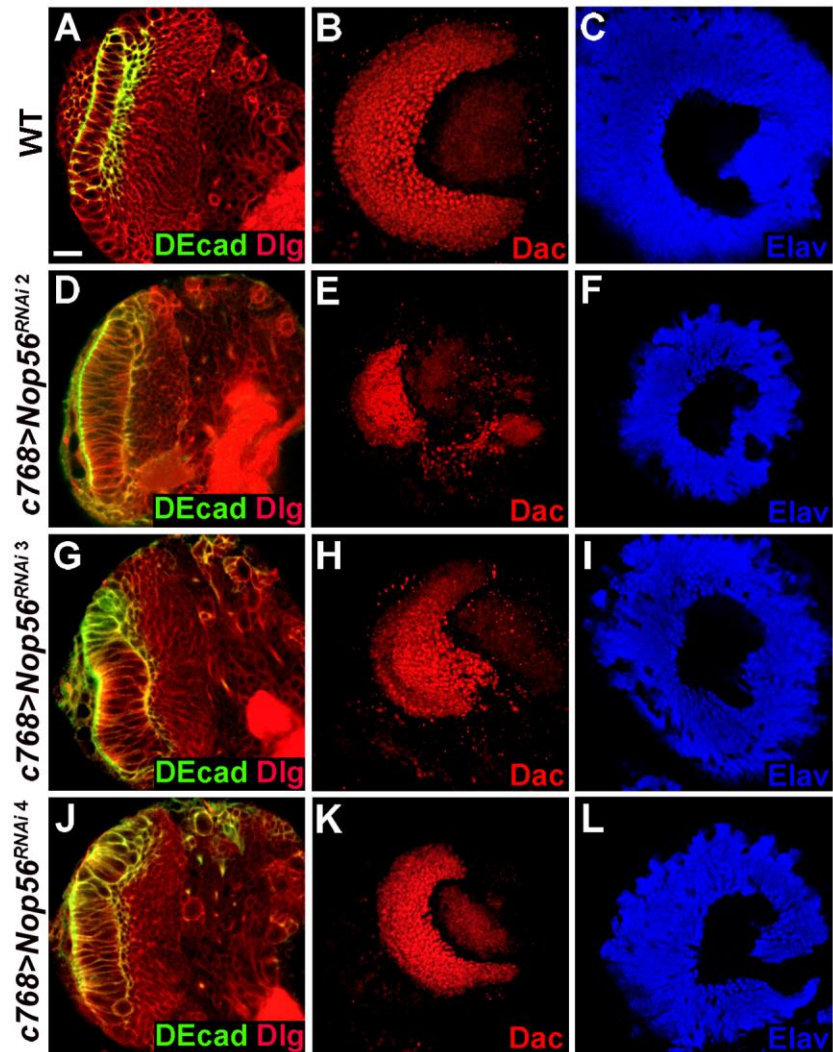

**Figure S1** *Nop56* RNAi knockdown causes defects in medulla and lamina development. Brains dissected from late-third instar larvae cultured at 31° were stained with the markers indicated. Three different *UAS-Nop56<sup>RNAi</sup>* constructs were expressed using *c768-Gal4*. Expression of these RNAi constructs inhibited neuroepithelial proliferation, resulting in elongated NEs (D, G, J), smaller lamina (E, H, K), and smaller medulla (F, I, L), compared to wild type (A-C). (A, D, G, J) Frontal view, lateral is to the left, medial to the right; (B, C, E, F, H, I, K, L) lateral view, anterior is to the left, dorsal is up. Scale bar: 20 $\mu$ m.
